# Supplementary material for: Retrospective study on the association between paternal occupational exposure to agrochemicals and childhood leukemia in Michoacán de Ocampo, México
Source: PeerJ journal article supplement (doi:10.7717/peerj.20219), 2025-11-06
Supplement: Supplemental_Data_S1.docx [file Supplemental_Data_S1.docx]

**Table S1. Paternal and maternal occupational activities.**

| Paternal ocupational activities |  |
| --- | --- |
| Agrochemicals related activities | Farmer  Peasant  Avocado cutter  Ochard caretaker  Avocado exporter  Day laborer  Worker in avocado packing house  Paun in the field  Avocado seller |
| Construction related activities | Bricklayer  Construction worker  Construction supervisor |
| Paints and solvents related activities | Craftsmen  Potters  Carpenter or carpentry assistant  Tinker and Painter  Sandals weaver  Painter |
| Other activities | Shoe cleaner  Driver  Cook, baker or food-related activity  Businessman  Unemployed  Electrician  Employee or worker in a factory or store  Doctor  Military, police or security guard  Optometrist  Fisherman  Plumber  Butcher  Tattoo artist  Vet |
| Maternal occupational activities | |
| Home related activities | Housewife |
| Agrochemicals related activities | Peasant  Cutter or collector  Day laborer  Sale of fertilizers |
| Paints and solvents related activities | Potter  Craftswoman |
| Other activities | Travel agent  Cook or kitchen assistant  Business woman  Accountant  Employee or worker in a factory or store  Nurse  Personal Trainer  Student  Teacher  Manicurist  Babysitter  Secretary |
