# Supplementary material for: Retrospective study on the association between paternal occupational exposure to agrochemicals and childhood leukemia in Michoacán de Ocampo, México
Source: PeerJ journal article supplement (doi:10.7717/peerj.20219), 2025-11-06
Supplement: Supplemental_Data_S2.docx [file Supplemental_Data_S2.docx]

**Table S2**. **Division by municipalities of avocado and non-avocado regions.**

| Municipalities belonging to avocado-growing regions | Acuitzio  Aguililla  Apatzingán  Aquila  Ario  Charapan  Charo  Chilchota  Chinicuila  Coalcomán  Coeneo  Copándaro  Cotija  Erongarícuaro  Hidalgo  Huiramba  Indaparapeo  Irimbo  Jiménez  Jiquilpan  Juárez  Jungapeo  Lagunillas | Los Reyes  Madero  Maravatío  Morelia  Morelos  Nocupétaro  Nuevo Parangaricutiro  Nuevo Urecho  Ocampo  Pajacuarán  Panindícuaro  Pátzcuaro  Peribán  Purépero  Queréndaro  Quiroga  Sahuayo  Salvador Escalante  Susupuato  Tacámbaro  Tancítaro | | Tangamandapio  Tangancícuaro  Tanhuato  Taretan  Tarímbaro  Tepalcatepec  Tingambato  Tingüindín  Tlazazalca  Tocumbo  Turicato  Tuxpan  Tuzantla  Tzintzuntzan  Tzitzio  Uruapan  Vista Hermosa  Yurécuaro  Zacapu  Zinapécuaro  Ziracuaretiro  Zitácuaro |
| --- | --- | --- | --- | --- |
| Municipalities belonging to non- avocado-growing regions | Álvaro Obregón  Angamacutiro  Angangueo  Aporo  Arteaga  Briseñas  Buenavista  Carácuaro  Coahuayana  Contepec  Cuitzeo  Chavinda  Cherán  Chucándiro  Churintzio  Churumuco  Ecuandureo | | Epitacio Huerta  Huandacareo  Huaniqueo  Huetamo  Ixtlán  Jacona  José Sixto Verduzco  Marcos Castellanos  La Huacana  La Piedad  Lázaro Cárdenas  Múgica  Nahuatzen  Numarán  Parácuaro  Paracho  Penjamillo | Puruándiro  Cojumatlán  San Lucas  Santa Ana Maya  Senguio  Tanhuato  Tiquicheo  Tlalpujahua  Tumbiscatío  Venustiano Carranza  Villamar  Zamora  Zináparo |
