# Supplementary material for: Retrospective study on the association between paternal occupational exposure to agrochemicals and childhood leukemia in Michoacán de Ocampo, México
Source: PeerJ journal article supplement (doi:10.7717/peerj.20219), 2025-11-06
Supplement: Supplemental_Data_S3.docx [file Supplemental_Data_S3.docx]

**Table S3. Frequency of the leading cause of death from leukemia.**

| Leading cause of death | n | % |
| --- | --- | --- |
| Septic shock/Sepsis | 38 | 45 |
| Hemorrhage | 14 | 16 |
| Leukemia | 7 | 8 |
| Hypovolemic Shock | 6 | 7 |
| Respiratory insufficiency | 5 | 6 |
| cardiogenic shock | 4 | 5 |
| Unclassified crash | 3 | 4 |
| Acidosis | 2 | 2 |
| Multiorgan Failure | 2 | 2 |
| Non-infectious colitis and gastroenteritis | 1 | 1 |
