# Supplementary material for: Retrospective study on the association between paternal occupational exposure to agrochemicals and childhood leukemia in Michoacán de Ocampo, México
Source: PeerJ journal article supplement (doi:10.7717/peerj.20219), 2025-11-06
Supplement: Supplemental_Data_S4.docx [file Supplemental_Data_S4.docx]

**Table S4.** **Childhood Leukemia Incidence and Standardized Ratios by Municipality**

| Municipality | 2010 Population Census | 2020 Population Census | Average population per municipality | Expected cases | Observed cases | Ratio O/E | Lower bound  of the CI95% | Uper bound of the CI95 % |
| --- | --- | --- | --- | --- | --- | --- | --- | --- |
| Acuitzio | 3487 | 3554 | 3520.5 | 0.93 | 2 | 2.1 | 0.2599 | 7.7520 |
| Aguililla | 5397 | 4648 | 5022.5 | 1.33 | 1 | 0.8 | 0.0190 | 4.1905 |
| Álvaro Obregón | 6496 | 6657 | 6576.5 | 1.74 | 2 | 1.1 | 0.1391 | 4.1498 |
| Angamacutiro | 4158 | 4130 | 4144 | 1.10 | 0 | 0.0 |  |  |
| Angangueo | 3433 | 3474 | 3453.5 | 0.91 | 1 | 1.1 | 0.0277 | 6.0943 |
| Apatzingán | 39943 | 39964 | 39953.5 | 10.58 | 11 | 1.0 | 0.5192 | 1.8609 |
| Aporo | 1051 | 1035 | 1043 | 0.28 | 0 | 0.0 |  |  |
| Aquila | 8836 | 9169 | 9002.5 | 2.38 | 2 | 0.8 | 0.1016 | 3.0315 |
| Ario | 11158 | 11762 | 11460 | 3.03 | 1 | 0.3 | 0.0083 | 1.8365 |
| Arteaga | 7156 | 6930 | 7043 | 1.86 | 3 | 1.6 | 0.3318 | 4.7023 |
| Briseñas | 3220 | 3423 | 3321.5 | 0.88 | 0 | 0.0 |  |  |
| Buenavista | 13714 | 15002 | 14358 | 3.80 | 5 | 1.3 | 0.4271 | 3.0698 |
| Carácuaro | 3147 | 3092 | 3119.5 | 0.83 | 2 | 2.4 | 0.2933 | 8.7485 |
| Coahuayana | 4454 | 4337 | 4395.5 | 1.16 | 0 | 0.0 |  |  |
| Coalcomán | 5719 | 5556 | 5637.5 | 1.49 | 1 | 0.7 | 0.0170 | 3.7333 |
| Coeneo | 5300 | 5200 | 5250 | 1.39 | 5 | 3.6 | 1.1681 | 8.3955 |
| Contepec | 11040 | 11390 | 11215 | 2.97 | 4 | 1.3 | 0.3671 | 3.4496 |
| Copándaro | 2823 | 2722 | 2772.5 | 0.73 | 1 | 1.4 | 0.0345 | 7.5912 |
| Cotija | 5967 | 5467 | 5717 | 1.51 | 1 | 0.7 | 0.0167 | 3.6814 |
| Cuitzeo | 8696 | 8870 | 8783 | 2.33 | 3 | 1.3 | 0.2661 | 3.7707 |
| Charapan | 3606 | 3620 | 3613 | 0.96 | 0 | 0.0 |  |  |
| Charo | 6151 | 6386 | 6268.5 | 1.66 | 3 | 1.8 | 0.3728 | 5.2832 |
| Chavinda | 2869 | 2833 | 2851 | 0.75 | 2 | 2.6 | 0.3209 | 9.5724 |
| Cherán | 5707 | 6043 | 5875 | 1.56 | 5 | 3.2 | 1.0439 | 7.5024 |
| Chilchota | 11337 | 11964 | 11650.5 | 3.08 | 4 | 1.3 | 0.3534 | 3.3206 |
| Chinicuila | 1683 | 1451 | 1567 | 0.41 | 1 | 2.4 | 0.0610 | 13.4312 |
| Chucándiro | 1384 | 1064 | 1224 | 0.32 | 1 | 3.1 | 0.0781 | 17.1950 |
| Churintzio | 1273 | 1092 | 1182.5 | 0.31 | 0 | 0.0 |  |  |
| Churumuco | 4962 | 5085 | 5023.5 | 1.33 | 3 | 2.3 | 0.4652 | 6.5926 |
| Ecuandureo | 3346 | 3030 | 3188 | 0.84 | 1 | 1.2 | 0.0300 | 6.6018 |
| Epitacio Huerta | 5249 | 5261 | 5255 | 1.39 | 0 | 0.0 |  |  |
| Erongarícuaro | 4199 | 4361 | 4280 | 1.13 | 2 | 1.8 | 0.2138 | 6.3764 |
| Gabriel Zamora | 6752 | 7021 | 6886.5 | 1.82 | 4 | 2.2 | 0.5978 | 5.6178 |
| Hidalgo | 38110 | 39040 | 38575 | 10.21 | 14 | 1.4 | 0.7495 | 2.3002 |
| La Huacana | 10672 | 10628 | 10650 | 2.82 | 6 | 2.1 | 0.7810 | 4.6321 |
| Huandacareo | 3073 | 3057 | 3065 | 0.81 | 0 | 0.0 |  |  |
| Huaniqueo | 1919 | 1774 | 1846.5 | 0.49 | 0 | 0.0 |  |  |
| Huetamo | 12030 | 11305 | 11667.5 | 3.09 | 13 | 4.2 | 2.2410 | 7.1973 |
| Huiramba | 2535 | 2841 | 2688 | 0.71 | 0 | 0.0 |  |  |
| Indaparapeo | 5229 | 5175 | 5202 | 1.38 | 4 | 2.9 | 0.7914 | 7.4370 |
| Irimbo | 4761 | 4735 | 4748 | 1.26 | 2 | 1.6 | 0.1927 | 5.7479 |
| Ixtlán | 3700 | 3427 | 3563.5 | 0.94 | 1 | 1.1 | 0.0268 | 5.9062 |
| Jacona | 20773 | 21665 | 21219 | 5.62 | 5 | 0.9 | 0.2890 | 2.0772 |
| Jiménez | 3425 | 3118 | 3271.5 | 0.87 | 4 | 4.6 | 1.2584 | 11.8255 |
| Jiquilpan | 9144 | 8496 | 8820 | 2.33 | 1 | 0.4 | 0.0108 | 2.3862 |
| Juárez | 4421 | 4612 | 4516.5 | 1.20 | 0 | 0.0 |  |  |
| Jungapeo | 6775 | 7162 | 6968.5 | 1.84 | 3 | 1.6 | 0.3354 | 4.7525 |
| Lagunillas | 1661 | 1659 | 1660 | 0.44 | 1 | 2.3 | 0.0576 | 12.6787 |
| Madero | 6184 | 6260 | 6222 | 1.65 | 1 | 0.6 | 0.0154 | 3.3826 |
| Maravatío | 26728 | 28898 | 27813 | 7.36 | 4 | 0.5 | 0.1480 | 1.3910 |
| Marcos Castellanos | 3739 | 3833 | 3786 | 1.00 | 0 | 0.0 |  |  |
| Lázaro Cárdenas | 53121 | 54261 | 53691 | 14.21 | 8 | 0.6 | 0.2430 | 1.1090 |
| Morelia | 188980 | 201015 | 194997.5 | 51.62 | 45 | 0.9 | 0.6358 | 1.1664 |
| Morelos | 2314 | 2055 | 2184.5 | 0.58 | 1 | 1.7 | 0.0438 | 9.6345 |
| Múgica | 14246 | 14311 | 14278.5 | 3.78 | 9 | 2.4 | 1.0887 | 4.5199 |
| Nahuatzen | 8680 | 9119 | 8899.5 | 2.36 | 2 | 0.8 | 0.1028 | 3.0666 |
| Nocupétaro | 2701 | 2776 | 2738.5 | 0.72 | 1 | 1.4 | 0.0349 | 7.6855 |
| Nuevo Parangaricutiro | 6128 | 6395 | 6261.5 | 1.66 | 2 | 1.2 | 0.1461 | 4.3585 |
| Nuevo Urecho | 2503 | 2379 | 2441 | 0.65 | 1 | 1.5 | 0.0392 | 8.6221 |
| Numarán | 2659 | 2663 | 2661 | 0.70 | 0 | 0.0 |  |  |
| Ocampo | 8475 | 8975 | 8725 | 2.31 | 3 | 1.3 | 0.2679 | 3.7958 |
| Pajacuarán | 6109 | 6096 | 6102.5 | 1.62 | 0 | 0.0 |  |  |
| Panindícuaro | 4624 | 4335 | 4479.5 | 1.19 | 4 | 3.4 | 0.9191 | 8.6365 |
| Parácuaro | 8513 | 8811 | 8662 | 2.29 | 4 | 1.7 | 0.4753 | 4.4663 |
| Paracho | 10749 | 11277 | 11013 | 2.92 | 4 | 1.4 | 0.3738 | 3.5129 |
| Pátzcuaro | 27323 | 28429 | 27876 | 7.38 | 5 | 0.7 | 0.2200 | 1.5812 |
| Penjamillo | 4482 | 4222 | 4352 | 1.15 | 2 | 1.7 | 0.2102 | 6.2709 |
| Peribán | 8064 | 8915 | 8489.5 | 2.25 | 2 | 0.9 | 0.1078 | 3.2147 |
| La Piedad | 28427 | 29174 | 28800.5 | 7.62 | 4 | 0.5 | 0.1429 | 1.3433 |
| Purépero | 4058 | 3924 | 3991 | 1.06 | 1 | 0.9 | 0.0240 | 5.2735 |
| Puruándiro | 21285 | 20166 | 20725.5 | 5.49 | 5 | 0.9 | 0.2959 | 2.1267 |
| Queréndaro | 4198 | 4132 | 4165 | 1.10 | 1 | 0.9 | 0.0230 | 5.0532 |
| Quiroga | 7341 | 7789 | 7565 | 2.00 | 4 | 2.0 | 0.5442 | 5.1140 |
| Cojumatlán | 2891 | 3026 | 2958.5 | 0.78 | 0 | 0.0 |  |  |
| Los Reyes | 18867 | 21219 | 20043 | 5.31 | 6 | 1.1 | 0.4150 | 2.4613 |
| Sahuayo | 21796 | 22831 | 22313.5 | 5.91 | 0 | 0.0 |  |  |
| San Lucas | 5017 | 4917 | 4967 | 1.31 | 0 | 0.0 |  |  |
| Santa Ana Maya | 3639 | 3407 | 3523 | 0.93 | 0 | 0.0 |  |  |
| Salvador Escalante | 14937 | 15915 | 15426 | 4.08 | 7 | 1.7 | 0.6892 | 3.5318 |
| Senguio | 6285 | 6357 | 6321 | 1.67 | 1 | 0.6 | 0.0151 | 3.3296 |
| Susupuato | 2991 | 2945 | 2968 | 0.79 | 2 | 2.5 | 0.3083 | 9.1951 |
| Tacámbaro | 22841 | 24946 | 23893.5 | 6.33 | 13 | 2.1 | 1.0943 | 3.5145 |
| Tancítaro | 10462 | 10874 | 10668 | 2.82 | 2 | 0.7 | 0.0858 | 2.5582 |
| Tangamandapio | 9299 | 9689 | 9494 | 2.51 | 2 | 0.8 | 0.0964 | 2.8745 |
| Tangancícuaro | 9510 | 9462 | 9486 | 2.51 | 1 | 0.4 | 0.0101 | 2.2187 |
| Tanhuato | 4458 | 4415 | 4436.5 | 1.17 | 0 | 0.0 |  |  |
| Taretan | 4022 | 4340 | 4181 | 1.11 | 1 | 0.9 | 0.0229 | 5.0339 |
| Tarímbaro | 23535 | 35898 | 29716.5 | 7.87 | 3 | 0.4 | 0.0786 | 1.1145 |
| Tepalcatepec | 6902 | 6763 | 6832.5 | 1.81 | 1 | 0.6 | 0.0140 | 3.0804 |
| Tingambato | 4273 | 4613 | 4443 | 1.18 | 2 | 1.7 | 0.2059 | 6.1425 |
| Tinguindín | 3863 | 4139 | 4001 | 1.06 | 1 | 0.9 | 0.0239 | 5.2603 |
| Tiquicheo | 4993 | 4501 | 4747 | 1.26 | 4 | 3.2 | 0.8673 | 8.1498 |
| Tlalpujahua | 9150 | 9471 | 9310.5 | 2.46 | 2 | 0.8 | 0.0983 | 2.9312 |
| Tlazazalca | 1642 | 1448 | 1545 | 0.41 | 0 | 0.0 |  |  |
| Tocumbo | 3130 | 3135 | 3132.5 | 0.83 | 2 | 2.4 | 0.2921 | 8.7122 |
| Tumbiscatío | 2779 | 2182 | 2480.5 | 0.66 | 0 | 0.0 |  |  |
| Turicato | 10783 | 10208 | 10495.5 | 2.78 | 1 | 0.4 | 0.0091 | 2.0053 |
| Tuxpan | 8368 | 8463 | 8415.5 | 2.23 | 2 | 0.9 | 0.1087 | 3.2429 |
| Tuzantla | 5184 | 4711 | 4947.5 | 1.31 | 2 | 1.5 | 0.1849 | 5.5161 |
| Tzintzuntzan | 3974 | 4156 | 4065 | 1.08 | 5 | 4.6 | 1.5086 | 10.8430 |
| Tzitzio | 3230 | 3001 | 3115.5 | 0.82 | 1 | 1.2 | 0.0307 | 6.7555 |
| Uruapan | 92159 | 99081 | 95620 | 25.31 | 19 | 0.8 | 0.4519 | 1.1721 |
| Venustiano Carranza | 6792 | 6984 | 6888 | 1.82 | 0 | 0.0 |  |  |
| Villamar | 4802 | 4522 | 4662 | 1.23 | 2 | 1.6 | 0.1963 | 5.8539 |
| Vista Hermosa | 5499 | 5921 | 5710 | 1.51 | 0 | 0.0 |  |  |
| Yurécuaro | 9370 | 9658 | 9514 | 2.52 | 1 | 0.4 | 0.0101 | 2.2122 |
| Zacapu | 20792 | 21192 | 20992 | 5.56 | 5 | 0.9 | 0.2921 | 2.0997 |
| Zamora | 55494 | 57951 | 56722.5 | 15.02 | 9 | 0.6 | 0.2741 | 1.1378 |
| Zináparo | 743 | 678 | 710.5 | 0.19 | 1 | 5.3 | 0.1346 | 29.6223 |
| Zinapécuaro | 13919 | 13727 | 13823 | 3.66 | 9 | 2.5 | 1.1246 | 4.6688 |
| Ziracuaretiro | 4941 | 5632 | 5286.5 | 1.40 | 1 | 0.7 | 0.0181 | 3.9812 |
| Zitácuaro | 50267 | 51328 | 50797.5 | 13.45 | 6 | 0.4 | 0.1637 | 0.9711 |
| José Sixto Verduzco | 7108 | 6846 | 6977 | 1.85 | 0 | 0.0 |  |  |
